# Supplementary material for: Structural subtleties and catalytic activity of sodium aminophenolate complexes in polylactide degradation: towards sustainable waste management solutions
Source: Royal Society of Chemistry journal article supplement (doi:10.1039/d4dt01270d), 2024-01-01
Supplement: d4dt01270d1.pdf [file d4dt01270d1.pdf]

*Electronic Supplementary Information (ESI)*

Structural subtleties and catalytic activity of sodium  
aminophenolate complexes in polylactide degradation:  
towards sustainable waste management solutions

*Edyta Nizioł,<sup>a</sup> Aleksandra Marszałek-Harych,<sup>a</sup> Wiktor Zierkiewicz,<sup>b</sup> Łukasz John<sup>a</sup> and Jolanta Ejfler<sup>\*a</sup>*

---

<sup>a</sup> Faculty of Chemistry, University of Wrocław, 14 F. Joliot-Curie, 50-383 Wrocław, Poland, E-mail: jolanta.ejfler@uwr.edu.pl

<sup>b</sup> Faculty of Chemistry, Wrocław University of Science and Technology, 27 Wybrzeże Wyspiańskiego, 50-370 Wrocław, Poland

| Table of Contents                                                                                                                                                                                                                                 | Page |
|---------------------------------------------------------------------------------------------------------------------------------------------------------------------------------------------------------------------------------------------------|------|
| <b>Figure S1.</b> PLA degradation in the presence of (L <sup>Me</sup> )-Na-(THF) <sub>2</sub> monitored by <sup>1</sup> H NMR (C <sub>6</sub> D <sub>6</sub> ).                                                                                   | 2    |
| <b>Figure S2.</b> Comparison of PLA depolymerization spectra with different molar ratio [Na]/PLA for (L <sup>Ox</sup> )-Na-(THF) monitored by <sup>1</sup> H NMR (C <sub>6</sub> D <sub>6</sub> )                                                 | 2    |
| <b>Figure S3.</b> <sup>1</sup> H NMR of adduct (L <sup>Ox</sup> )-Na-(THF) with PLA in C <sub>6</sub> D <sub>6</sub> .                                                                                                                            | 3    |
| <b>Figure S4.</b> <sup>1</sup> H NMR of adduct (L <sup>C12</sup> )-Na-(THF) with PLA in C <sub>6</sub> D <sub>6</sub> .                                                                                                                           | 3    |
| <b>Figure S5.</b> <sup>1</sup> H NMR of adduct (L <sup>Me</sup> )-Na-(THF) <sub>2</sub> with PLA in C <sub>6</sub> D <sub>6</sub> .                                                                                                               | 4    |
| <b>Figure S6.</b> <sup>1</sup> H NMR of adduct (L <sup>Pic</sup> )-Na with PLA in C <sub>6</sub> D <sub>6</sub> .                                                                                                                                 | 4    |
| <b>Figure S7.</b> Comparison of PLA depolymerization spectra by using (L <sup>Pic</sup> )-Na in <sup>1</sup> H NMR in C <sub>6</sub> D <sub>6</sub> .                                                                                             | 5    |
| <b>Table S1.</b> Energies of calculated models for two proposed versions of the structural motifs of the active sodium catalysts in the PLA degradation reaction. Data are given in Hartree.                                                      | 6    |
| <b>Table S2.</b> Energies of calculated models for two proposed versions of the active catalyst (L <sup>Ox</sup> )-Na-(THF)(PLA) structural motif with decoordination of amine arm in the degradation reaction of PLA. Data are given in Hartree. | 7    |
| <b>Table S3.</b> Energies of calculated models for the proposed version of the active catalyst (L <sup>Ox</sup> )-Na-(THF) structural motif with one active centre in the degradation reaction of PLA. Data are given in Hartree.                 | 7    |

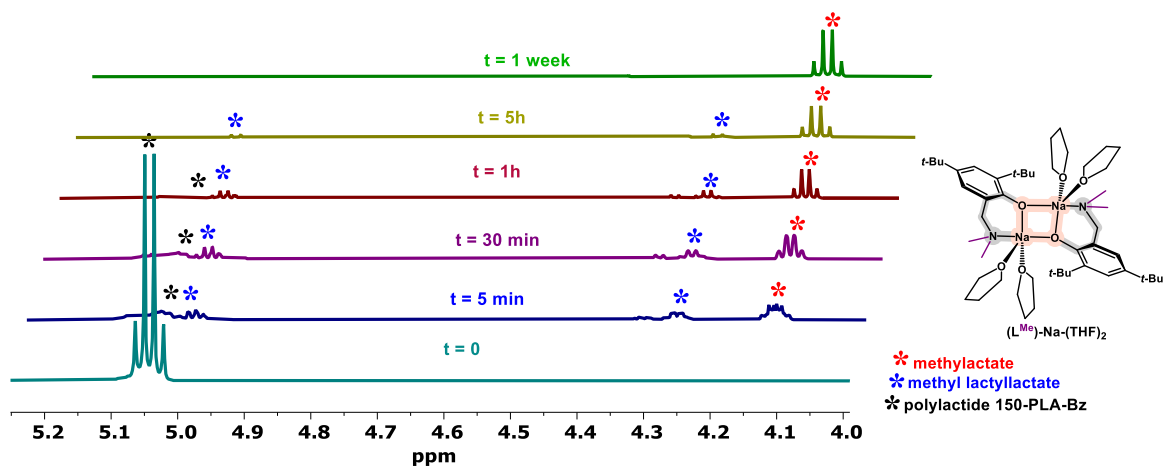

Figure S1. PLA degradation process in the presence of  $(\text{L}^{\text{Me}})\text{-Na-(THF)}_2$  monitored by  $^1\text{H}$  NMR ( $\text{C}_6\text{D}_6$ ).

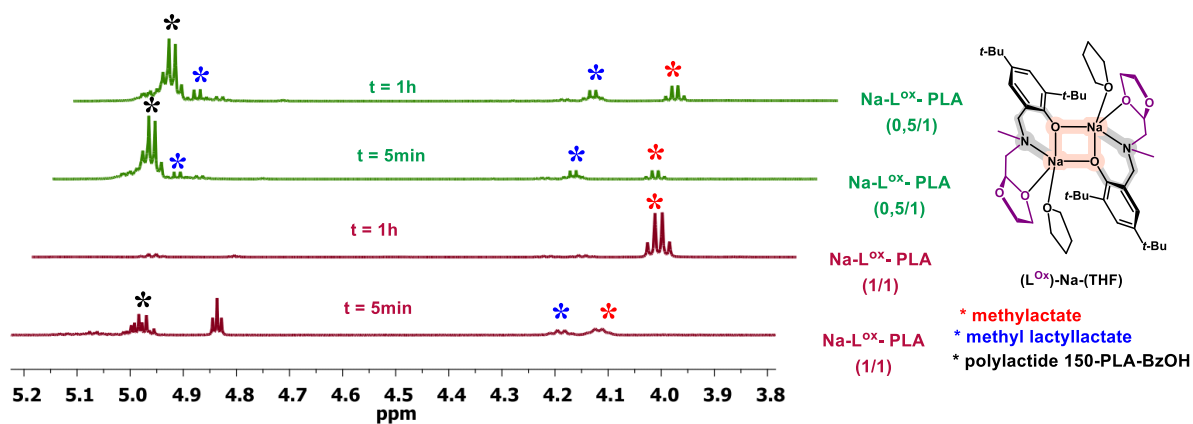

Figure S2. Comparison of PLA depolymerization spectra in the presence of  $(\text{L}^{\text{Ox}})\text{-Na-(THF)}$  with different molar ratio  $[\text{Na}]/\text{PLA}$  monitored by  $^1\text{H}$  NMR ( $\text{C}_6\text{D}_6$ ).

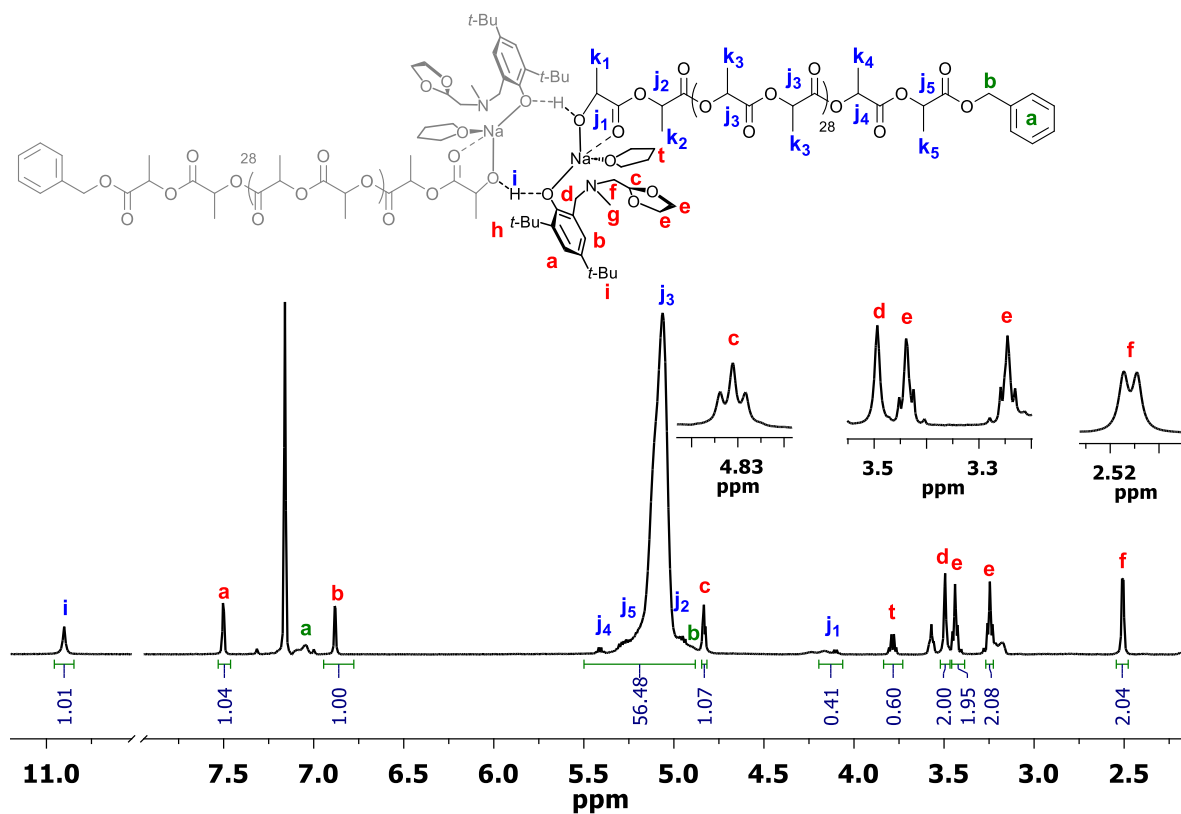

Figure S3.  $^1\text{H}$  NMR of adduct  $(\text{L}^{\text{Ox}})\text{-Na-(THF)}$  with PLA in  $\text{C}_6\text{D}_6$ .

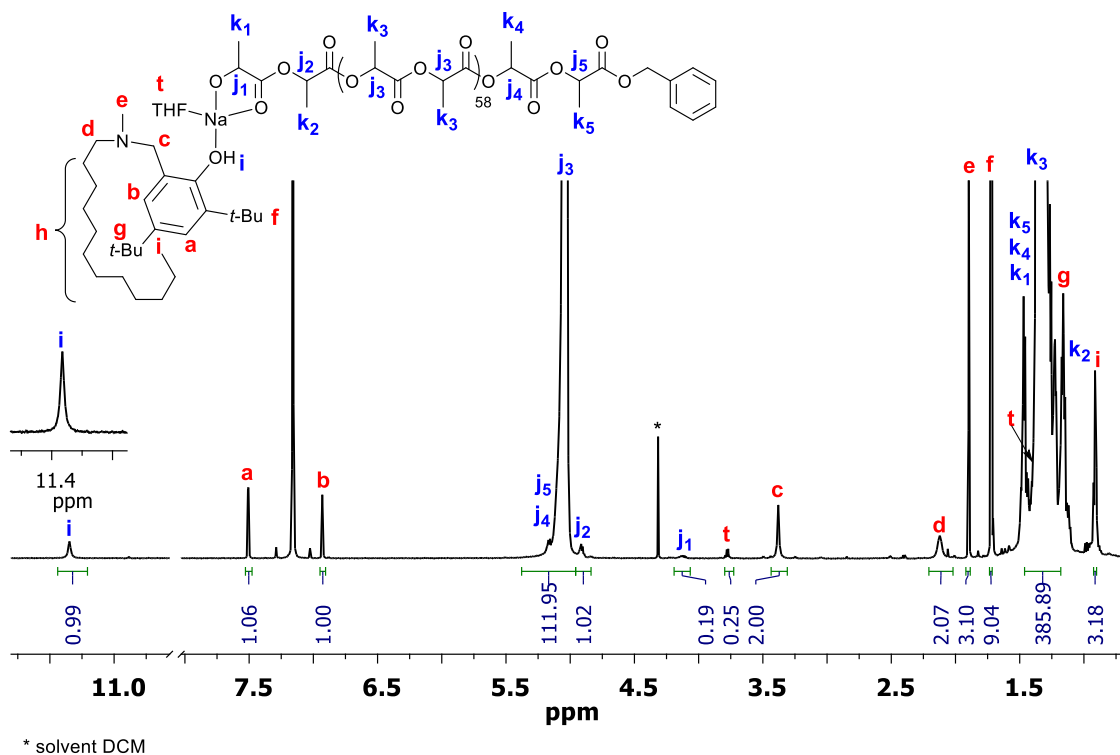

Figure S4.  $^1\text{H}$  NMR of adduct  $(\text{L}^{\text{C12}})\text{-Na-(THF)}$  with PLA in  $\text{C}_6\text{D}_6$ .

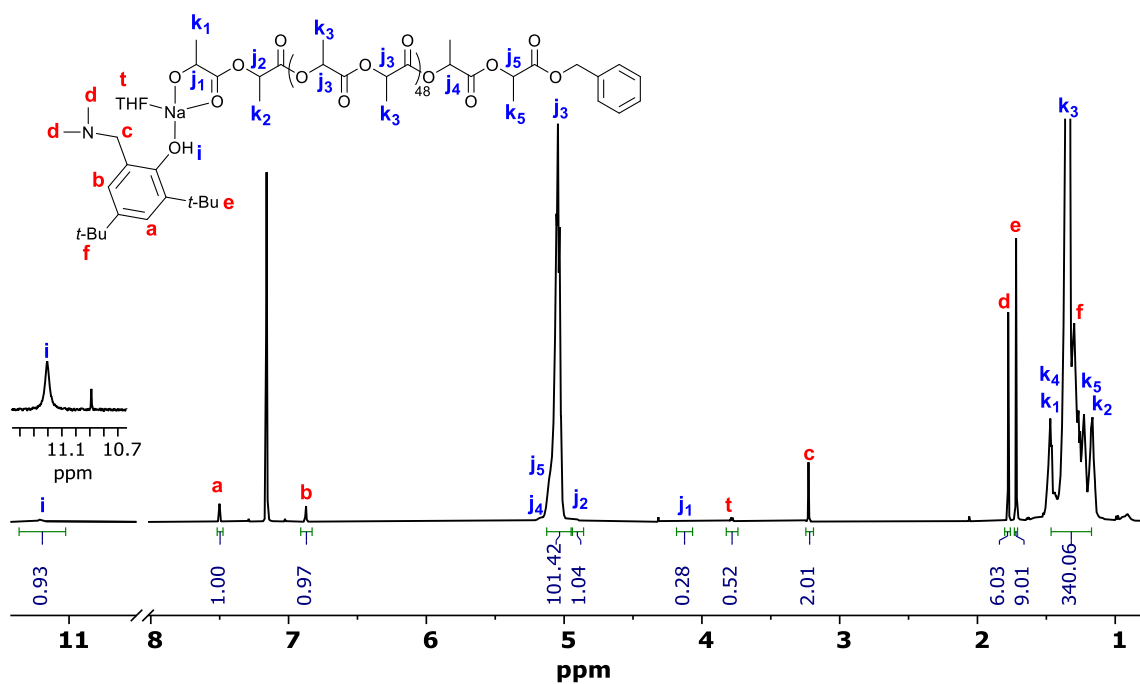

Figure S5.  $^1\text{H}$  NMR of adduct  $(\text{L}^{\text{Me}})\text{-Na}(\text{THF})_2$  with PLA in  $\text{C}_6\text{D}_6$ .

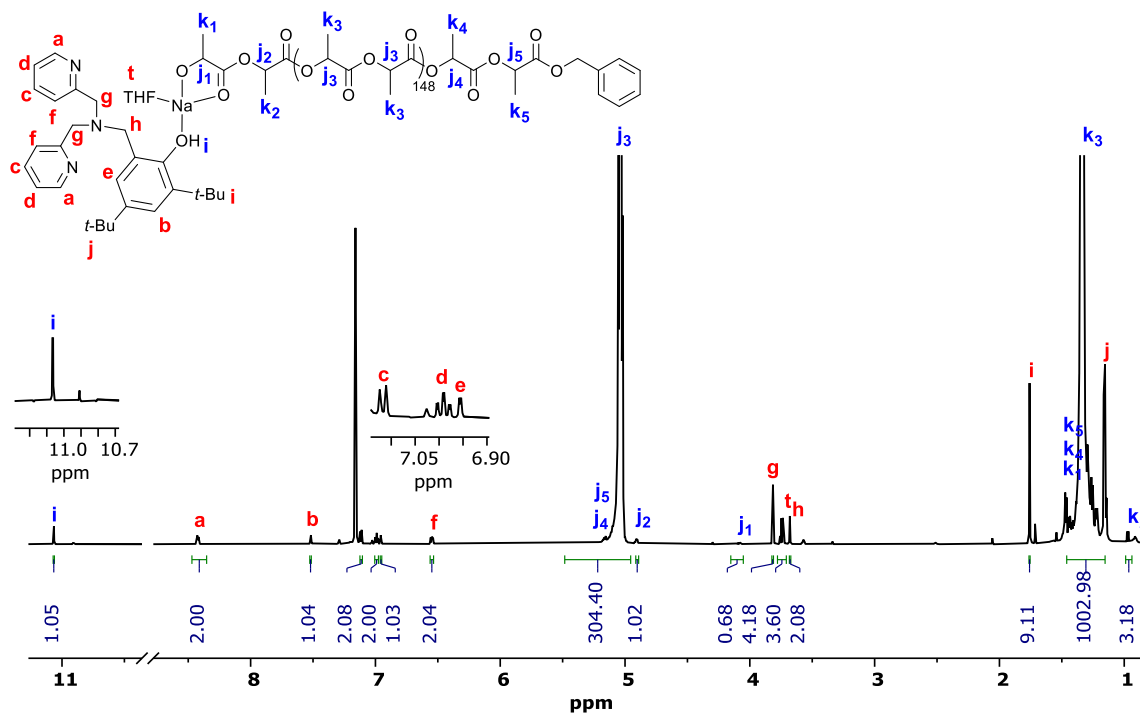

Figure S6.  $^1\text{H}$  NMR of adduct  $(\text{L}^{\text{Pic}})\text{-Na}$  with PLA in  $\text{C}_6\text{D}_6$ .

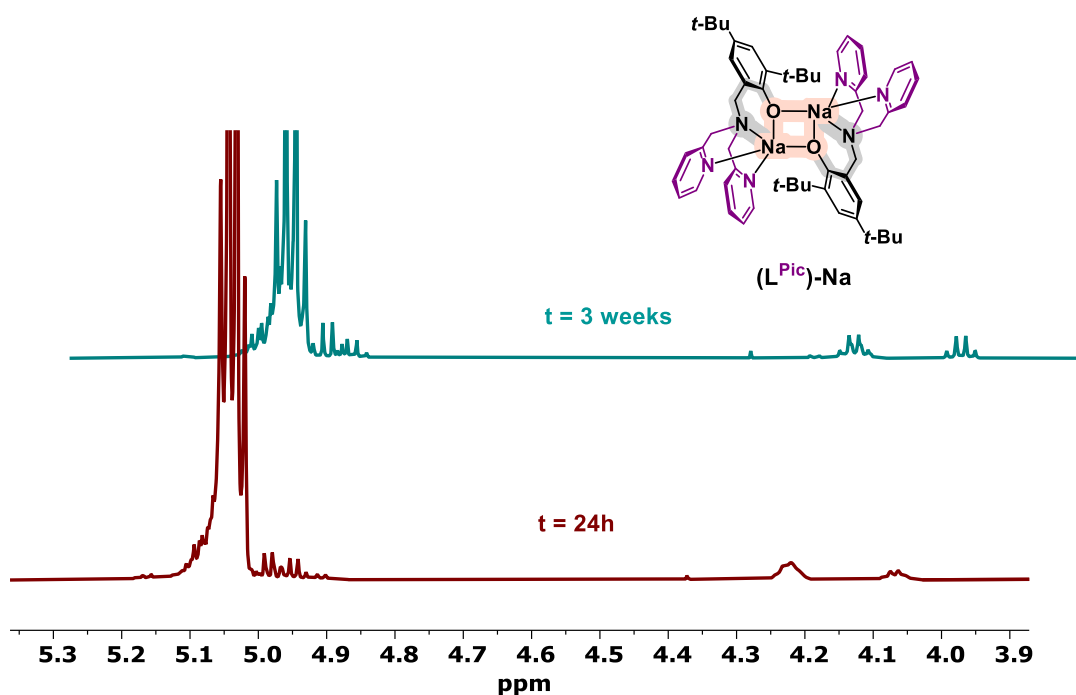

**Figure S7.** Comparison of PLA depolymerization spectra in the presence of  $(L^{Pic})\text{-Na}$  in  $^1\text{H}$  NMR  $\text{C}_6\text{D}_6$ .

**Table S1.** Energies of calculated models for two proposed versions of the structural motifs of the active sodium catalysts in the PLA degradation reaction. Data are given in Hartree.

|                                               | $E_{\text{tot}}$ | $E_{\text{tot}}$ with ZPE correction | H            | G            | $S^a$   |
|-----------------------------------------------|------------------|--------------------------------------|--------------|--------------|---------|
| $(L^{Bn})\text{-Na-(THF)}$                    | -3303.460549     | -3302.045167                         | -3301.967236 | -3302.164135 | 414.408 |
| $(L^{Bn})\text{-Na-(THF)(PLA)}$               | -4603.784366     | -4601.973558                         | -4601.865839 | -4602.126575 | 548.764 |
| $(L^{Bn})\text{-Na-(THF)(PLA)(ROH)}$          | -4835.254965     | -4833.334068                         | -4833.218221 | -4833.499149 | 591.262 |
| $(L^{Bn})\text{-Na-(THF)(LA-Me)}$             | -4069.359803     | -4067.692481                         | -4067.596080 | -4067.831676 | 495.853 |
| $(L^{Bn})\text{-Na-(THF)(PLA)}$               | -4603.808076     | -4601.997814                         | -4601.890120 | -4602.151032 | 549.134 |
| $(L^{Bn})\text{-Na-(THF)(PLA)(ROH)}$          | -4835.280945     | -4833.361123                         | -4833.245841 | -4833.522993 | 583.314 |
| $(L^{Bn})\text{-Na-(THF)(LA-Me)}$             | -4069.393970     | -4067.726537                         | -4067.629907 | -4067.866598 | 498.157 |
| $(L^{Me})\text{-Na-(THF)}_2$                  | -2844.167564     | -2842.840519                         | -2842.767187 | -2842.951596 | 388.120 |
| $(L^{Me})\text{-Na-(THF)}_2\text{(PLA)}$      | -4144.456252     | -4142.733063                         | -4142.630242 | -4142.878734 | 522.995 |
| $(L^{Me})\text{-Na-(THF)}_2\text{(PLA)(ROH)}$ | -4375.951451     | -4374.118976                         | -4374.007996 | -4374.275665 | 563.356 |
| $(L^{Me})\text{-Na-(THF)}_2\text{(LA-Me)}$    | -3610.047353     | -3608.467104                         | -3608.375772 | -3608.597440 | 466.540 |
| $(L^{Me})\text{-Na-(THF)}_2\text{(PLA)}$      | -4144.488641     | -4142.764941                         | -4142.662396 | -4142.911159 | 523.567 |
| $(L^{Me})\text{-Na-(THF)}_2\text{(PLA)(ROH)}$ | -4375.959765     | -4374.128818                         | -4374.017476 | -4374.286701 | 566.630 |
| $(L^{Me})\text{-Na-(THF)}_2\text{(LA-Me)}$    | -3610.065810     | -3608.485679                         | -3608.394186 | -3608.618956 | 473.070 |
| $(L^{C12})\text{-Na-(THF)}$                   | -3244.188363     | -3242.466504                         | -3242.377570 | -3242.597035 | 461.903 |
| $(L^{C12})\text{-Na-(THF)(PLA)}$              | -4544.475057     | -4542.360346                         | -4542.240561 | -4542.537995 | 626.001 |
| $(L^{C12})\text{-Na-(THF)(PLA)(ROH)}$         | -4776.001223     | -4773.774446                         | -4773.648273 | -4773.948492 | 631.864 |
| $(L^{C12})\text{-Na-(THF)(LA-Me)}$            | -4010.051711     | -4008.080648                         | -4007.971800 | -4008.246065 | 577.240 |

|                                        |              |              |              |              |         |
|----------------------------------------|--------------|--------------|--------------|--------------|---------|
| (L <sup>C12</sup> )-Na-(THF)(PLA)      | -4544.491270 | -4542.376354 | -4542.257090 | -4542.551691 | 620.040 |
| (L <sup>C12</sup> )-Na-(THF)(PLA)(ROH) | -4775.961398 | -4773.738489 | -4773.610486 | -4773.924201 | 660.268 |
| (L <sup>C12</sup> )-Na-(THF)(LA-Me)    | -4010.071539 | -4008.102042 | -4007.992783 | -4008.269421 | 582.235 |
| (L <sup>Pic</sup> )-Na                 | -2902.677795 | -2901.549981 | -2901.485433 | -2901.650461 | 347.331 |
| (L <sup>Pic</sup> )-Na-(PLA)           | -4202.974183 | -4201.452226 | -4201.357809 | -4201.588408 | 485.337 |
| (L <sup>Pic</sup> )-Na-(PLA)(ROH)      | -4434.464773 | -4432.834103 | -4432.731604 | -4432.979461 | 521.660 |
| (L <sup>Pic</sup> )-Na-(LA-Me)         | -3668.553897 | -3667.174855 | -3667.091202 | -3667.299903 | 439.249 |
| (L <sup>Pic</sup> )-Na-(PLA)           | -4202.995834 | -4201.473053 | -4201.378584 | -4201.610442 | 487.985 |
| (L <sup>Pic</sup> )-Na-(PLA)(ROH)      | -4434.469430 | -4432.838152 | -4432.735510 | -4432.987607 | 530.581 |
| (L <sup>Pic</sup> )-Na-(LA-Me)         | -3668.585781 | -3667.205850 | -3667.122586 | -3667.328051 | 432.439 |
| (L <sup>Ox</sup> )-Na-(THF)            | -2913.552811 | -2912.315754 | -2912.246484 | -2912.422298 | 370.032 |
| (L <sup>Ox</sup> )-Na-(THF)(PLA)       | -4213.852174 | -4212.218845 | -4212.119971 | -4212.361620 | 508.593 |
| (L <sup>Ox</sup> )-Na-(THF)(PLA)(ROH)  | -4445.362308 | -4443.619223 | -4443.512612 | -4443.768545 | 538.657 |
| (L <sup>Ox</sup> )-Na-(THF)(LA-Me)     | -3679.432804 | -3677.943526 | -3677.855614 | -3678.072777 | 457.058 |
| (L <sup>Ox</sup> )-Na-(THF)(PLA)       | -4213.871562 | -4212.238951 | -4212.140064 | -4212.381994 | 509.186 |
| (L <sup>Ox</sup> )-Na-(THF)(PLA)(ROH)  | -4445.343817 | -4443.602680 | -4443.495994 | -4443.755417 | 546.002 |
| (L <sup>Ox</sup> )-Na-(THF)(LA-Me)     | -3679.461323 | -3677.971559 | -3677.883960 | -3678.098296 | 451.107 |

<sup>a</sup> data are given in cal/mol\*K

**Table S2.** Energies of calculated models for two proposed versions of the active catalyst (L<sup>Ox</sup>)-Na-(THF)(PLA) structural motif with decoordination of amine arm in the degradation reaction of PLA. Data are given in Hartree.

|        |                                   | E <sub>tot</sub> | E <sub>tot</sub> with ZPE correction | H            | G            | S <sup>a</sup> |
|--------|-----------------------------------|------------------|--------------------------------------|--------------|--------------|----------------|
| Path A | (L <sup>Ox</sup> )-Na-(THF)(PLA)  | -4213.866080     | -4212.233286                         | -4212.134725 | -4212.375577 | 506.916        |
|        | (L <sup>Ox</sup> )-Na-(THF)(PLA)* | -4213.845786     | -4212.214269                         | -4212.115027 | -4212.361145 | 517.999        |
| Path B | (L <sup>Ox</sup> )-Na-(THF)(PLA)  | -4213.866608     | -4212.233981                         | -4212.135208 | -4212.378009 | 511.018        |
|        | (L <sup>Ox</sup> )-Na-(THF)(PLA)* | -4213.859906     | -4212.225599                         | -4212.127171 | -4212.366199 | 503.078        |

<sup>a</sup> data are given in cal/mol\*K

**Table S3** Energies of calculated models for the proposed version of the active catalyst (L<sup>Ox</sup>)-Na-(THF) structural motif with one active centre in the degradation reaction of PLA. Data are given in Hartree.

|                                       | E <sub>tot</sub> | E <sub>tot</sub> with ZPE correction | H            | G            | S <sup>a</sup> |
|---------------------------------------|------------------|--------------------------------------|--------------|--------------|----------------|
| (L <sup>Ox</sup> )-Na-(THF)(PLA)      | -3563.720827     | -3562.284897                         | -3562.201327 | -3562.406838 | 432.534        |
| (L <sup>Ox</sup> )-Na-(THF)(PLA)(ROH) | -3679.471069     | -3677.980285                         | -3677.892936 | -3678.106586 | 449.664        |
| (L <sup>Ox</sup> )-Na-(THF)(LA-Me)    | -3296.515150     | -3295.150354                         | -3295.072508 | -3295.264337 | 403.738        |

<sup>a</sup> data are given in cal/mol\*K
